# Supplementary material
Source: MDPI journal article supplement (https://www.mdpi.com/2073-4433/11/6/661)
Supplement: s1 [file s1]

# A novel method for carbonate quantification in atmospheric particulate matter

Denise C. Napolitano<sup>1</sup>, Hilairy E. Hartnett<sup>1,2</sup>, Pierre Herckes<sup>1</sup>

<sup>1</sup>School of Molecular Sciences, Arizona State University, Tempe, AZ 85287-1604, U.S.A.

<sup>2</sup>School of Earth and Space Exploration, Arizona State University, Tempe, AZ 85287-6004, U.S.A.

## Supplemental Info

### *1. Overview of Calculations*

In calculating the amount of carbonate present in a sample, the concentration of CO<sub>2</sub> released during acidification of a sample must be determined, taking into account changes in the volume and pressure inside of the jar throughout the experiment. At the start of each experiment, the ambient pressure and temperature were measured and monitored throughout the course of the experiment to ensure that no large fluctuations occurred. The ambient pressure and temperature were assumed to be the same as the initial pressure and temperature inside of the incubation jar.

The ideal gas law was first used to determine the moles of gas initially present in the container:

$$n = \frac{p \times V}{R \times T} \quad (\text{eq. 1A})$$

where n = moles of gas, p = pressure, V = volume of the container, R = 0.082058 L atm mol<sup>-1</sup> K<sup>-1</sup> (ideal gas constant), and T = temperature. To provide an example, the calculations for jar 3 in the

experiments performed in Table 1 are detailed below. The jar has a volume of 177.05 mL and contained 0.07622 mg ( $9.073 \times 10^{-7}$  mol) of solid  $\text{NaHCO}_3$  at an ambient pressure of 0.9891 atm and temperature of 294.4 K. The moles of gas initially present in the container are:

$$n = \frac{0.9891 \text{ atm} \times 0.17705 \text{ L}}{0.082058 \text{ L atm mol}^{-1} \text{ K}^{-1} \times 294.4 \text{ K}} = 0.007249 \text{ mol} \quad (\text{eq. 1B})$$

5 mL of air were then removed from the container using a gas-tight syringe to measure the background  $\text{CO}_2$  concentration, resulting in a change in volume of the system:

$$V_1 = V + 0.005 \text{ L} \quad (\text{eq. 2A})$$

where  $V_1$  is the sum of the volume of the container and the volume of the syringe. For this particular jar,

$$V_1 = 0.17705 \text{ L} + 0.005 \text{ L} = 0.18205 \text{ L} \quad (\text{eq. 2B})$$

A new pressure of the system was calculated based on the change in volume:

$$p_1 = \frac{n \times R \times T}{V_1} \quad (\text{eq. 3A})$$

Where  $p_1$  is the new system pressure. For the above example,

$$p_1 = \frac{0.007249 \text{ mol} \times 0.082058 \text{ L atm mol}^{-1} \text{ K}^{-1} \times 294.4 \text{ K}}{0.18205 \text{ L}} = 0.9619 \text{ atm} \quad (\text{eq. 3B})$$

This pressure was then used to calculate the moles of air removed from the container via the 5mL syringe:

$$n_1 = \frac{p_1 \times 0.005 \text{ L}}{R \times T} \quad (\text{eq. 4A})$$

where  $n_1$  is the moles of air in the 5mL syringe. For this example,

$$n_1 = \frac{0.9619 \text{ atm} \times 0.005 \text{ L}}{0.082058 \text{ L atm mol}^{-1} \text{ K}^{-1} \times 294.4 \text{ K}} = 1.991 \times 10^{-4} \text{ mol} \quad (\text{eq. 4B})$$

The new moles of air in the incubation jar,  $n_2$ , was calculated via subtraction:

$$n_2 = n - n_1 \quad (\text{eq. 5A})$$

In this system:

$$n_2 = 0.007249 \text{ mol} - 1.991 \times 10^{-4} \text{ mol} = 0.007050 \text{ mol} \quad (\text{eq. 5B})$$

A new pressure inside of the jar,  $p_2$ , was then calculated:

$$p_2 = \frac{n_2 \times R \times T}{V} \quad (\text{eq. 6A})$$

$$p_2 = \frac{0.007050 \text{ mol} \times 0.082058 \text{ L atm mol}^{-1} \text{ K}^{-1} \times 294.4 \text{ K}}{0.17705 \text{ L}} = 0.9619 \text{ atm} \quad (\text{eq. 6B})$$

The background  $\text{CO}_2$  concentration,  $[\text{CO}_2]_b$ , was measured in this jar to be 500 ppmv. 2.2 mL of 1M HCl was then added to the jar, resulting in a new volume container,  $V_3$ :

$$V_3 = V - V_{\text{HCl}} \quad (\text{eq. 7A})$$

$$V_3 = 0.17705 \text{ L} - 0.0022 \text{ L} = 0.17485 \text{ L} \quad (\text{eq. 7B})$$

After sufficient time was provided for the acid to react with the carbonate sample, 5 mL of air were again removed for  $\text{CO}_2$  measurements, resulting in  $V_4$ , the volume of the container containing acid and with the 5 mL syringe in place:

$$V_4 = V_3 + 0.005 \text{ L} \quad (\text{eq. 8A})$$

$$V_4 = 0.17485 \text{ L} + 0.005 \text{ L} = 0.17985 \text{ L} \quad (\text{eq. 8B})$$

A new pressure inside of the jar,  $p_3$ , was calculated:

$$p_3 = \frac{n_2 \times R \times T}{V_4} \quad (\text{eq. 9A})$$

$$p_3 = \frac{0.007050 \text{ mol} \times 0.082058 \text{ L atm mol}^{-1} \text{ K}^{-1} \times 294.4 \text{ K}}{0.17985 \text{ L}} = 0.9470 \text{ atm} \quad (\text{eq. 9B})$$

The moles of air removed by the 5 mL syringe during sampling,  $n_3$ , were calculated,

$$n_3 = \frac{p_3 \times 0.005 \text{ L}}{R \times T} \quad (\text{eq. 10A})$$

$$n_3 = \frac{0.9470 \text{ atm} \times 0.005 \text{ L}}{0.082058 \text{ L atm mol}^{-1} \text{ K}^{-1} \times 294.4 \text{ K}} = 1.960 \times 10^{-4} \text{ mol} \quad (\text{eq. 10B})$$

followed by the moles of air remaining in the jar,  $n_4$ ,

$$n_4 = n_2 - n_3 \quad (\text{eq. 11A})$$

$$n_4 = 0.007050 \text{ mol} - 1.960 \times 10^{-4} \text{ mol} = 0.006854 \text{ mol} \quad (\text{eq. 11B})$$

assuming that the moles of CO<sub>2</sub> gas formed would have a minimal contribution to the total moles n<sub>2</sub> or n<sub>4</sub>. The new pressure in the container, p<sub>4</sub>, was then determined:

$$p_4 = \frac{n_4 \times R \times T}{V_3} \quad (\text{eq. 12A})$$

$$p_4 = \frac{0.006854 \text{ mol} \times 0.082058 \text{ L atm mol}^{-1} \text{ K}^{-1} \times 294.4 \text{ K}}{0.17485 \text{ L}} = 0.9470 \text{ atm} \quad (\text{eq. 12B})$$

The concentration of CO<sub>2</sub> gas in the system, [CO<sub>2</sub>]<sub>1</sub>, was measured as 596 ppmv. The concentration of CO<sub>2</sub> that formed in the reaction [CO<sub>2</sub>]<sub>f</sub>, was calculated,

$$[CO_2]_f = [CO_2]_1 - [CO_2]_b \quad (\text{eq. 13A})$$

$$[CO_2]_f = 596 \text{ ppmv} - 500 \text{ ppmv} = 96 \text{ ppmv} \quad (\text{eq. 13B})$$

and the moles of CO<sub>2</sub> formed were determined:

$$n_{CO_2} = \frac{[CO_2]_f \times 10^{-6} \times p_3 \times V_4}{R \times T} \quad (\text{eq. 14A})$$

$$n_{CO_2} = \frac{96 \text{ ppmv} \times 10^{-6} \times 0.9470 \text{ atm} \times 0.17985 \text{ L}}{0.082058 \text{ L atm mol}^{-1} \text{ K}^{-1} \times 294.4 \text{ K}} = 6.769 \times 10^{-7} \text{ mol} \quad (\text{eq. 14B})$$

If subsequent measurements of [CO<sub>2</sub>]<sub>f</sub> were made, the moles of formed CO<sub>2</sub> that were removed by the syringe were calculated, and this value was added to the next calculation of n<sub>CO<sub>2</sub></sub> to account for sampling loss:

$$n_{CO_2 \text{ sampled}} = \frac{0.005 \text{ L}}{V_4} \times n_{CO_2} \quad (\text{eq. 15A})$$

$$n_{CO_2 \text{ sampled}} = \frac{0.005 \text{ L}}{0.17985 \text{ L}} \times 6.768 \times 10^{-7} \text{ mol} = 1.882 \times 10^{-8} \text{ mol} \quad (\text{eq. 15B})$$

**Table S1, Experiments performed on three containers at 5, 15, and 25 minutes, and 4 hours after HCl addition, to determine a suitable incubation time.**

| Incubation Jar Number | Ambient Pressure (atm) | Ambient Temperature (K) | Amount of NaHCO <sub>3</sub> ( $\times 10^{-7}$ mol) | Volume of Container (L) | Background CO <sub>2</sub> Concentration (ppmv) | Volume 1M HCl added (L) | 5 Minute Incubation             |                                                      |                    |
|-----------------------|------------------------|-------------------------|------------------------------------------------------|-------------------------|-------------------------------------------------|-------------------------|---------------------------------|------------------------------------------------------|--------------------|
|                       |                        |                         |                                                      |                         |                                                 |                         | CO <sub>2</sub> Pressure (ppmv) | Moles CO <sub>2</sub> Formed ( $\times 10^{-7}$ mol) | Relative Error (%) |
| C                     | 0.9891                 | 294.5                   | 3.70                                                 | 0.1771                  | 698                                             | 0.003                   | 729                             | 2.185                                                | -40.94             |
| J                     | 0.9891                 | 294.5                   | 3.44                                                 | 0.1776                  | 562                                             | 0.003                   | 592                             | 2.122                                                | -38.24             |
| K                     | 0.9891                 | 294.5                   | 4.23                                                 | 0.1773                  | 522                                             | 0.003                   | 579                             | 4.024                                                | -4.82              |

  

| Incubation Jar Number | 15 Minute Incubation            |                                                      |                    | 25 Minute Incubation            |                                                      |                    | 4 Hour Incubation               |                                                      |                    |
|-----------------------|---------------------------------|------------------------------------------------------|--------------------|---------------------------------|------------------------------------------------------|--------------------|---------------------------------|------------------------------------------------------|--------------------|
|                       | CO <sub>2</sub> Pressure (ppmv) | Moles CO <sub>2</sub> Formed ( $\times 10^{-7}$ mol) | Relative Error (%) | CO <sub>2</sub> Pressure (ppmv) | Moles CO <sub>2</sub> Formed ( $\times 10^{-7}$ mol) | Relative Error (%) | CO <sub>2</sub> Pressure (ppmv) | Moles CO <sub>2</sub> Formed ( $\times 10^{-7}$ mol) | Relative Error (%) |
| C                     | 723                             | 1.774                                                | -52.05             | 719                             | 1.508                                                | -59.25             | 630                             | -4.255                                               | -215.00            |
| J                     | 590                             | 1.984                                                | -42.24             | 587                             | 1.784                                                | -48.08             | 577                             | 1.134                                                | -66.99             |
| K                     | 577                             | 3.887                                                | -8.06              | 575                             | 3.754                                                | -11.22             | 553                             | 2.327                                                | -44.97             |

**Table S2 Experiments performed on three containers at 15, 20, and 25 minutes, and 3.5 hours after HCl addition, to determine a suitable incubation time.**

| Incubation Jar Number | Ambient Pressure (atm) | Ambient Temperature (K) | Amount of NaHCO <sub>3</sub> ( $\times 10^{-7}$ mol) | Volume of Container (L) | Background CO <sub>2</sub> Concentration (ppmv) | Volume 1M HCl added (L) | 15 Minute Incubation            |                                                      |                    |
|-----------------------|------------------------|-------------------------|------------------------------------------------------|-------------------------|-------------------------------------------------|-------------------------|---------------------------------|------------------------------------------------------|--------------------|
|                       |                        |                         |                                                      |                         |                                                 |                         | CO <sub>2</sub> Pressure (ppmv) | Moles CO <sub>2</sub> Formed ( $\times 10^{-7}$ mol) | Relative Error (%) |
| C                     | 0.9933                 | 294.5                   | 5.02                                                 | 0.1771                  | 453                                             | 0.003                   | 512                             | 4.176                                                | -16.82             |
| J                     | 0.9933                 | 294.5                   | 4.40                                                 | 0.1776                  | 461                                             | 0.003                   | 509                             | 3.409                                                | -22.59             |
| K                     | 0.9933                 | 294.5                   | 4.49                                                 | 0.1773                  | 468                                             | 0.003                   | 519                             | 3.616                                                | -19.50             |

  

| Incubation Jar Number | 20 Minute Incubation            |                                                      |                    | 25 Minute Incubation            |                                                      |                    | 3.5 Hour Incubation             |                                                      |                    |
|-----------------------|---------------------------------|------------------------------------------------------|--------------------|---------------------------------|------------------------------------------------------|--------------------|---------------------------------|------------------------------------------------------|--------------------|
|                       | CO <sub>2</sub> Pressure (ppmv) | Moles CO <sub>2</sub> Formed ( $\times 10^{-7}$ mol) | Relative Error (%) | CO <sub>2</sub> Pressure (ppmv) | Moles CO <sub>2</sub> Formed ( $\times 10^{-7}$ mol) | Relative Error (%) | CO <sub>2</sub> Pressure (ppmv) | Moles CO <sub>2</sub> Formed ( $\times 10^{-7}$ mol) | Relative Error (%) |
| C                     | 509                             | 3.970                                                | -20.93             | 506                             | 3.769                                                | -24.93             | 496                             | 3.119                                                | -37.88             |
| J                     | 507                             | 3.271                                                | -25.73             | 505                             | 3.137                                                | -28.78             | 508                             | 3.333                                                | -24.33             |
| K                     | 515                             | 3.340                                                | -25.64             | 514                             | 3.273                                                | -27.13             | 504                             | 2.622                                                | -41.63             |

**Table S3 Experiments performed on three containers to determine a suitable incubation time. The first measurement was taken 20 minutes after HCl addition, and subsequent measurements were taken every 30 minutes.**

| Incubation Jar Number | Ambient Pressure (atm) | Ambient Temperature (K) | Amount of NaHCO <sub>3</sub> ( $\times 10^{-7}$ mol) | Volume of Container (L) | Background CO <sub>2</sub> Concentration (ppmv) | Volume 1M HCl added (L) | 20 Minute Incubation            |                                                      |                    |
|-----------------------|------------------------|-------------------------|------------------------------------------------------|-------------------------|-------------------------------------------------|-------------------------|---------------------------------|------------------------------------------------------|--------------------|
|                       |                        |                         |                                                      |                         |                                                 |                         | CO <sub>2</sub> Pressure (ppmv) | Moles CO <sub>2</sub> Formed ( $\times 10^{-7}$ mol) | Relative Error (%) |
| C                     | 0.9924                 | 294.4                   | 4.05                                                 | 0.1771                  | 458                                             | 0.003                   | 511                             | 3.749                                                | -7.46              |
| J                     | 0.9924                 | 294.4                   | 3.52                                                 | 0.1776                  | 457                                             | 0.003                   | 500                             | 3.052                                                | -13.37             |
| K                     | 0.9924                 | 294.4                   | 3.61                                                 | 0.1773                  | 459                                             | 0.003                   | 505                             | 3.260                                                | -9.74              |

  

| Incubation Jar Number | 50 Minute Incubation            |                                                      |                    | 80 Minute Incubation            |                                                      |                    | 110 Minute Incubation           |                                                      |                    |
|-----------------------|---------------------------------|------------------------------------------------------|--------------------|---------------------------------|------------------------------------------------------|--------------------|---------------------------------|------------------------------------------------------|--------------------|
|                       | CO <sub>2</sub> Pressure (ppmv) | Moles CO <sub>2</sub> Formed ( $\times 10^{-7}$ mol) | Relative Error (%) | CO <sub>2</sub> Pressure (ppmv) | Moles CO <sub>2</sub> Formed ( $\times 10^{-7}$ mol) | Relative Error (%) | CO <sub>2</sub> Pressure (ppmv) | Moles CO <sub>2</sub> Formed ( $\times 10^{-7}$ mol) | Relative Error (%) |
| C                     | 507                             | 3.474                                                | -14.25             | 502                             | 3.140                                                | -22.50             | 499                             | 2.945                                                | -27.31             |
| J                     | 499                             | 2.983                                                | -15.33             | 497                             | 2.849                                                | -19.14             | 495                             | 2.719                                                | -22.84             |
| K                     | 503                             | 3.122                                                | -13.56             | 499                             | 2.854                                                | -20.97             | 497                             | 2.724                                                | -24.58             |

  

| Incubation Jar Number | 140 Minute Incubation           |                                                      |                    | 170 Minute Incubation           |                                                      |                    |
|-----------------------|---------------------------------|------------------------------------------------------|--------------------|---------------------------------|------------------------------------------------------|--------------------|
|                       | CO <sub>2</sub> Pressure (ppmv) | Moles CO <sub>2</sub> Formed ( $\times 10^{-7}$ mol) | Relative Error (%) | CO <sub>2</sub> Pressure (ppmv) | Moles CO <sub>2</sub> Formed ( $\times 10^{-7}$ mol) | Relative Error (%) |
| C                     | 495                             | 2.693                                                | -33.55             | 491                             | 2.447                                                | -39.61             |
| J                     | 494                             | 2.655                                                | -24.64             | 492                             | 2.532                                                | -28.14             |
| K                     | 494                             | 2.534                                                | -29.83             | 492                             | 2.411                                                | -33.24             |
